# Supplementary material for: The association of systemic inflammatory biomarkers with non-alcoholic fatty liver disease: a large population-based cross-sectional study
Source: PubMed Central journal article supplement (PMC10767190; doi:10.1016/j.pmedr.2023.102536), 2023-12-07

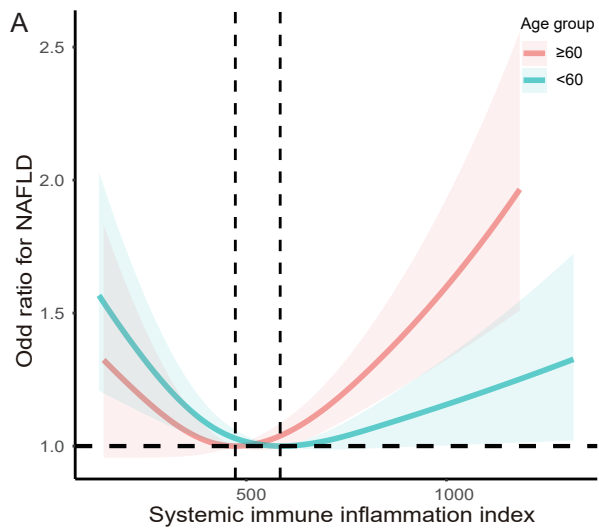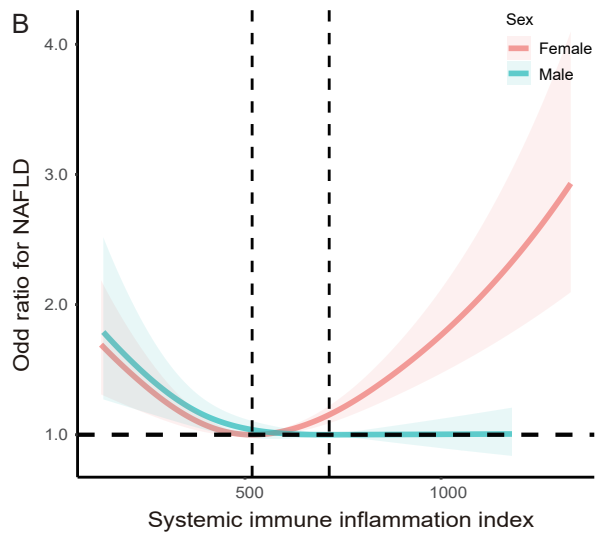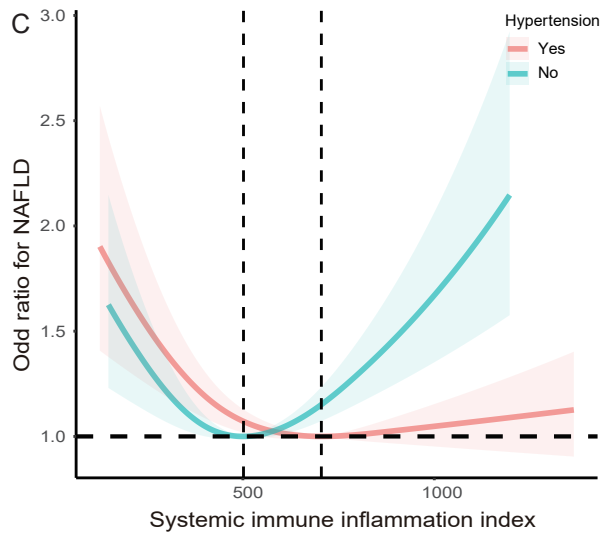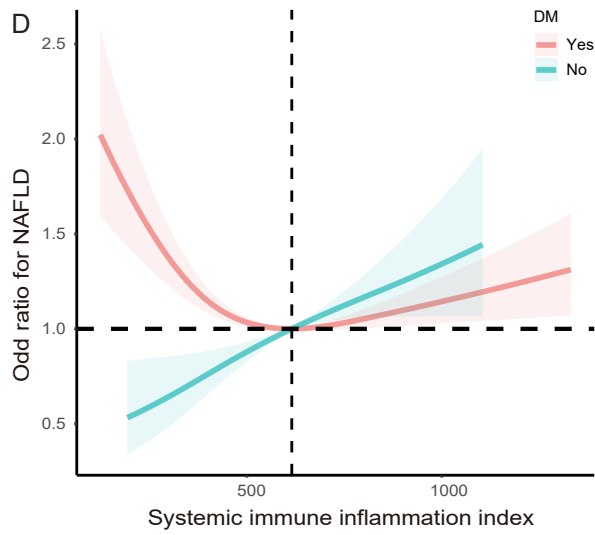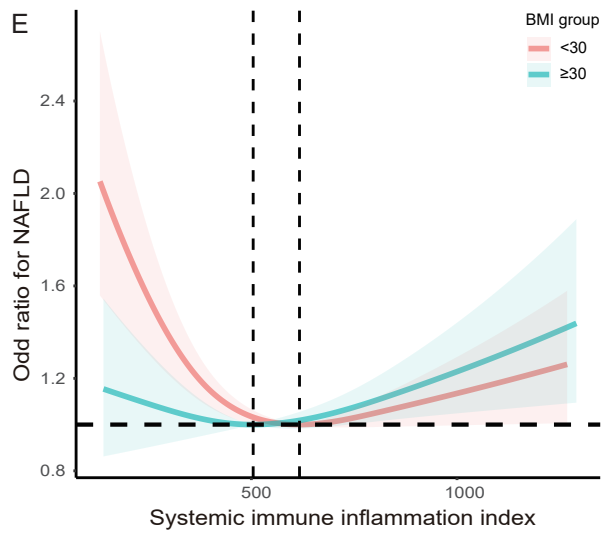

Supplement: mmc1.pdf [file mmc1.pdf]
